# Supplementary material for: Complement C3aR depletion reverses HIF-1α–induced metabolic impairment and enhances microglial response to Aβ pathology
Source: JCI journal article supplement (doi:10.1172/jci167501), 2023-06-14
Supplement: sd1 [file 1]

301 Moved Permanently

# Moved Permanently

The document has moved here.
